# Supplementary material for: Effects of the aldehyde-derived ring substituent on the properties of two new bioinspired trimethoxybenzoylhydrazones: methyl vs nitro groups
Source: publisher site journal article supplement (doi:10.3762/bjoc.19.125), 2023-11-10
Supplement: Additional file 1 [file 1860-5397-19-125-S1.pdf]

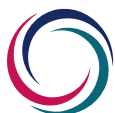

## Supporting Information

for

### **Effects of the aldehyde-derived ring substituent on the properties of two new bioinspired trimethoxybenzoylhydrazones: methyl vs nitro groups**

Dayanne Martins, Roberta Lamosa, Talis Uelisson da Silva, Carolina B. P. Ligiero, Sérgio de Paula Machado, Daphne S. Cukierman and Nicolás A. Rey

*Beilstein J. Org. Chem.* **2023**, *19*, 1713–1727. [doi:10.3762/bjoc.19.125](https://doi.org/10.3762/bjoc.19.125)

## Additional information

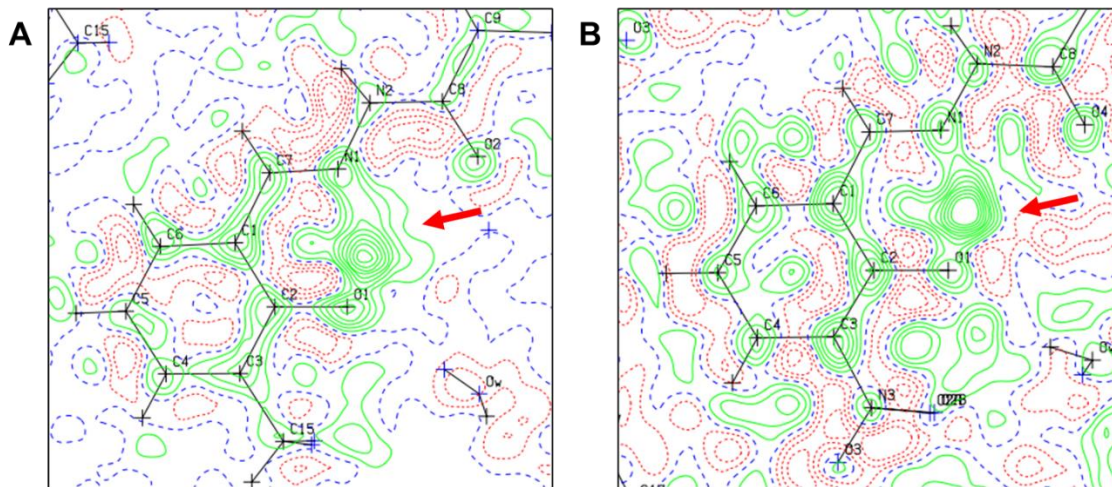

**Figure S1:** Fourier difference maps without the H. (A) **hdz-CH<sub>3</sub>**; plane 16.0517*x*, -1.4375*y*, -14.0518*z*, contour level (e/Å<sup>3</sup>) -0.25, 0.45, 0.05, resolution 26.4°. (B) **hdz-NO<sub>2</sub>**; plane 6.3871*x*, 0.3473*y*, 8.5161*z*, contour level (e/Å<sup>3</sup>) -0.20, 0.45, 0.05, resolution 25.3°.

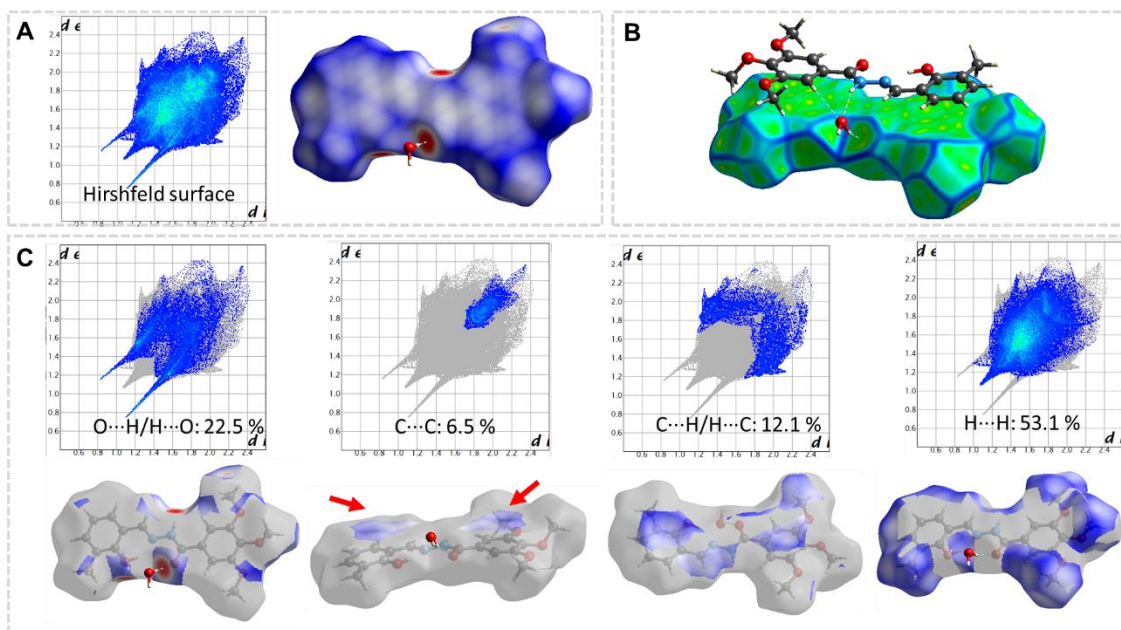

**Figure S2:** Hirshfeld surface for **hdz-CH<sub>3</sub>**. (A) Hirshfeld surface and  $d_{\text{norm}}$  map (−0.5725 to 1.1747) for all interactions. (B) Curvedness. (C)  $d_{\text{norm}}$  map filtered by type of interaction and Fingerprint plots.

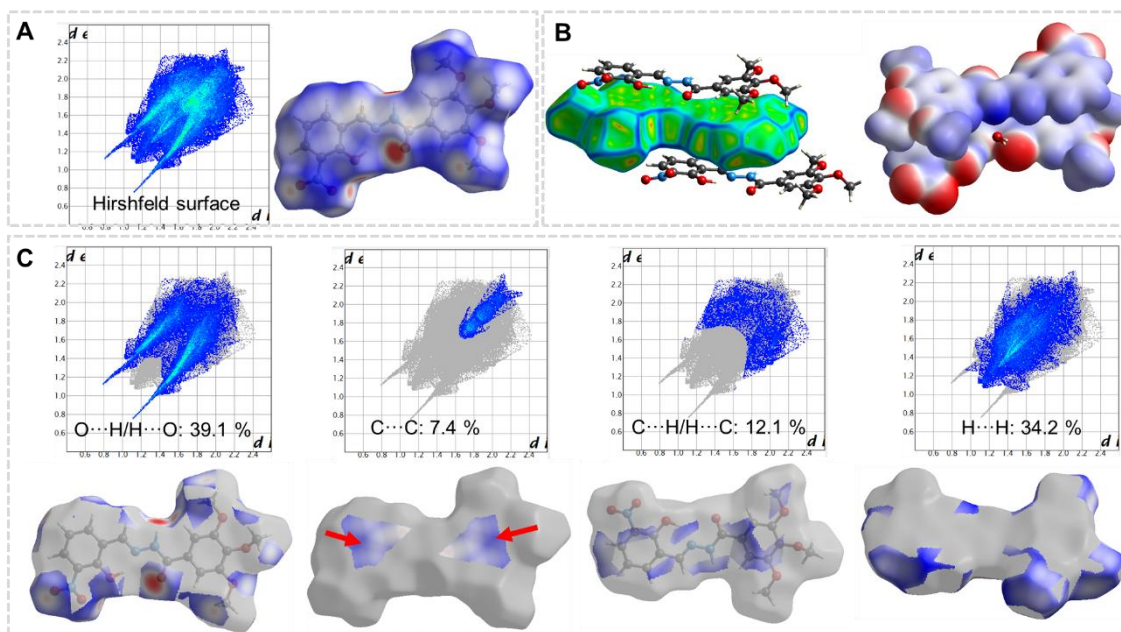

**Figure S3:** Hirshfeld surface for **hdz-NO<sub>2</sub>**. (A) Hirshfeld surface and  $d_{\text{norm}}$  map (−0.5725 to 1.1747) for all interactions. (B) Left: curvedness. Right: electrostatic potential (−0.0811 to 0.1788 au) over the electron density surface [*isosurface* 0.008 e au<sup>−3</sup>/DFT/B3LYP/6-311(d,p)]. (C)  $d_{\text{norm}}$  map filtered by type of interaction and Fingerprint plots.

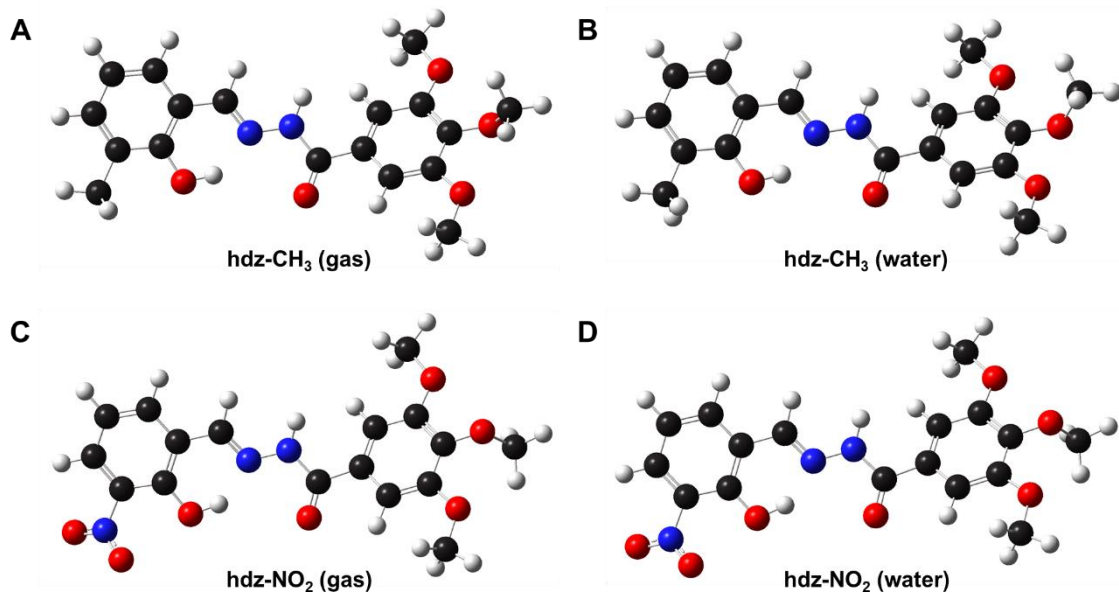

**Figure S4:** Optimized structures for **hdz-CH<sub>3</sub>** (A) in the gas phase and (B) in water; and for **hdz-NO<sub>2</sub>** (C) in the gas phase and (D) in water. Levels of theory were [B3LYP/6-311G(d,p)] and [B3LYP/6-311G(d,p)IEFPCM] for each phase (gas and water-continuum model), respectively.

**Table S1:** Selected experimental and theoretical [levels of theory B3LYP/6-311G(d,p) and B3LYP/6-311G(d,p)IEFPCM for gas and water phases, respectively] geometric parameters for **hdz-CH<sub>3</sub>**.

| Bond lengths (Å)       | Experimental | Calculated |             |
|------------------------|--------------|------------|-------------|
|                        |              | Gas phase  | Water phase |
| C1–C2                  | 1.405(2)     | 1.418      | 1.418       |
| C1–C6                  | 1.398(3)     | 1.407      | 1.407       |
| C2–O1                  | 1.357(2)     | 1.345      | 1.351       |
| C3–C18                 | 1.507(3)     | 1.505      | 1.506       |
| C1–C7                  | 1.450(3)     | 1.451      | 1.453       |
| C7=N1                  | 1.279(3)     | 1.286      | 1.287       |
| N1–N2                  | 1.375(2)     | 1.356      | 1.359       |
| N2–C8                  | 1.355(3)     | 1.390      | 1.378       |
| C8=O2                  | 1.226(2)     | 1.214      | 1.223       |
| C8–C9                  | 1.491(2)     | 1.499      | 1.498       |
| C9–C14                 | 1.387(3)     | 1.399      | 1.399       |
| C9–C10                 | 1.385(2)     | 1.394      | 1.396       |
| C13–O5                 | 1.368(2)     | 1.360      | 1.358       |
| C12–O4                 | 1.372(2)     | 1.364      | 1.369       |
| C11–O3                 | 1.363(2)     | 1.359      | 1.358       |
| <b>Bond angles (°)</b> |              |            |             |
| C6–C1–C2               | 118.9(2)     | 119.042    | 118.976     |
| C2–C3–C18              | 119.7(2)     | 119.085    | 119.495     |
| C1–C2–O1               | 121.8(2)     | 122.718    | 122.031     |
| C7–N1–N2               | 118.9(2)     | 119.224    | 118.955     |
| N1–N2–C8               | 116.9(2)     | 119.898    | 119.946     |
| N2–C8–O2               | 121.0(2)     | 122.275    | 122.153     |
| O2–C8–C9               | 121.4(2)     | 123.247    | 122.754     |
| C8–C9–C10              | 124.2(2)     | 123.052    | 122.635     |
| C14–C13–O5             | 124.2(2)     | 124.546    | 124.563     |
| C13–C12–O4             | 119.4(2)     | 119.288    | 120.405     |
| C12–C11–O3             | 115.3(2)     | 115.310    | 115.485     |

**Table S2:** Selected experimental and theoretical [levels of theory B3LYP/6-311G(d,p) and B3LYP/6-311G(d,p)IEFPCM for gas and water phases, respectively] geometric parameters for **hdz-NO<sub>2</sub>**.

|                  | Experimental | Gas     | Water   |
|------------------|--------------|---------|---------|
| Bond lengths (Å) |              |         |         |
| C1–C2            | 1.411(3)     | 1.427   | 1.427   |
| C1–C6            | 1.390(4)     | 1.400   | 1.400   |
| C2–O1            | 1.344(3)     | 1.326   | 1.326   |
| C3–N3            | 1.452(5)     | 1.476   | 1.476   |
| C1–C7            | 1.456(4)     | 1.454   | 1.454   |
| C7=N1            | 1.279(3)     | 1.284   | 1.284   |
| N1–N2            | 1.373(3)     | 1.351   | 1.351   |
| N2–C8            | 1.365(3)     | 1.397   | 1.397   |
| C8=O2            | 1.219(3)     | 1.212   | 1.212   |
| C8–C9            | 1.488(3)     | 1.495   | 1.495   |
| C9–C14           | 1.390(3)     | 1.400   | 1.400   |
| C9–C10           | 1.384(3)     | 1.395   | 1.395   |
| C13–O5           | 1.370(3)     | 1.359   | 1.359   |
| C12–O4           | 1.373(3)     | 1.362   | 1.362   |
| C11–O3           | 1.358(3)     | 1.358   | 1.358   |
| Bond angles (°)  |              |         |         |
| C6–C1–C2         | 119.7(2)     | 119.867 | 119.867 |
| C2–C3–N3         | 121.1(3)     | 121.171 | 121.171 |
| C1–C2–O1         | 121.6(3)     | 122.499 | 122.499 |
| C7–N1–N2         | 120.0(2)     | 119.984 | 119.984 |
| N1–N2–C8         | 116.5(2)     | 119.492 | 119.492 |
| N2–C8–O2         | 120.5(2)     | 121.836 | 121.836 |
| O2–C8–C9         | 122.2(2)     | 123.699 | 123.699 |
| C8–C9–C10        | 123.6(2)     | 122.938 | 122.938 |
| C14–C13–O5       | 123.8(2)     | 124.574 | 124.574 |
| C13–C12–O4       | 119.6(2)     | 119.233 | 119.233 |
| C12–C11–O3       | 115.3(2)     | 115.325 | 115.325 |

**Table S3:** Experimental and calculated [gas, level of theory B3LYP/6-311++G(2d,p) and water phase, B3LYP/6-311G(d,p)/IEFPCM] IR data for the main absorptions of **hdz-CH<sub>3</sub>**, with proposed assignments.

| Experimental<br>(KBr) | Frequencies (cm <sup>-1</sup> ) |             | Vibrational assignments                                                                                                                                      |
|-----------------------|---------------------------------|-------------|--------------------------------------------------------------------------------------------------------------------------------------------------------------|
|                       | Gas phase                       | Water phase |                                                                                                                                                              |
| 3431 (w)              | 3407                            | 3313        | $\nu(\text{O-H})_{\text{phenol}} + \nu(\text{O-H})_{\text{water}}$                                                                                           |
| 3282 (w)              | 3227                            | 3223        | $\nu(\text{C-H})_{\text{TMP ring}}$                                                                                                                          |
| 3175 (w)              | 3526                            | 3538        | $\nu(\text{N-H})$                                                                                                                                            |
| 3063 (m)              | 3162                            | 3166        | $\nu_{\text{as}}(\text{C-H})_{\text{MBA ring}}$                                                                                                              |
| 3037 (m)              | 3029                            | 3072        | $\nu(\text{C-H})_{\text{azomethine}}$                                                                                                                        |
| 2983 (m)              | 3138                            | 3146        | $\nu_{\text{as}}(\text{C-H})_{\text{methoxyl}}$                                                                                                              |
| 2971 (m)              | 3129                            | 3132        | $\nu_{\text{as}}(\text{C-H})_{\text{methoxyl}}$                                                                                                              |
| 2950 (m)              | 3109                            | 3111        | $\nu_{\text{as}}(\text{C-H})_{\text{methyl}}$                                                                                                                |
| 2933 (m)              | 3083                            | 3087        | $\nu_{\text{as}}(\text{C-H})_{\text{methoxyl}}$                                                                                                              |
| 2917 (m)              | 3079                            | 3073        | $\nu_{\text{as}}(\text{C-H})_{\text{methyl}}$                                                                                                                |
| 2871 (m)              | 3030                            | 3027        | $\nu_{\text{sym}}(\text{C-H})_{\text{methyl}}$                                                                                                               |
| 2836 (m)              | 3008                            | 3020        | $\nu_{\text{sym}}(\text{C-H})_{\text{methoxyl}}$                                                                                                             |
| 1658 (s)              | 1762                            | 1712        | $\nu(\text{C=O}) + \delta(\text{N-N-H})_{\text{hydrazone}}$                                                                                                  |
| 1620 (m)              | 1675                            | 1669        | $\nu(\text{C=N})_{\text{hydrazone}} + \delta_{\text{ip}}(\text{N=C-H})_{\text{azomethine}} + \nu(\text{C=C})_{\text{MBA ring}}$                              |
| 1607 (m)              | 1649                            | 1645        | $\nu(\text{C=C})_{\text{MBA ring}}$                                                                                                                          |
| 1590 (s)              | 1619                            | 1617        | $\nu(\text{C=C})_{\text{TMP ring}}$                                                                                                                          |
| 1551 (w)              | 1551                            | 1561        | $\delta(\text{N-N-H})_{\text{hydrazone}}$                                                                                                                    |
| 1505 (m)              | 1532                            | 1528        | $\nu(\text{C=C})_{\text{TMP ring}} + \delta_{\text{ip}}(\text{C=C-H})_{\text{TMP ring}}$                                                                     |
| 1469 (m)              | 1513                            | 1513        | $\nu(\text{C=C})_{\text{MBA ring}} + \delta_{\text{ip}}(\text{C=C-H})_{\text{MBA ring}}$                                                                     |
| 1454 (m)              | 1504                            | 1494        | $\delta(\text{H-C-H})_{\text{methyl}} + \delta(\text{H-C-H})_{\text{methoxyl}} + \delta_{\text{ip}}(\text{C=C-H})_{\text{MBA ring}}$                         |
| 1435 (sh)             | 1487                            | 1485        | $\delta(\text{H-C-H})_{\text{methoxyl}} + \delta(\text{O-C-H})_{\text{methoxyl}}$                                                                            |
| 1417 (s)              | 1442                            | 1437        | $\delta(\text{O-C-H})_{\text{methoxyl}} + \delta_{\text{ip}}(\text{C=C-H})_{\text{TMP ring}}$                                                                |
| 1395 (s)              | 1465                            | 1456        | $\delta(\text{H-C-H})_{\text{methyl}} + \delta(\text{O-C-H})_{\text{methoxyl}} + \delta_{\text{ip}}(\text{C=C-H})_{\text{MBA ring}}$                         |
| 1376 (m)              | 1430                            | 1441        | $\delta_{\text{ip}}(\text{C-O-H})_{\text{phenol}}$                                                                                                           |
| 1355 (s)              | 1383                            | 1385        | $\delta_{\text{ip}}(\text{N=C-H})_{\text{azomethine}} + \delta(\text{N-N-H})_{\text{hydrazone}}$                                                             |
| 1337 (m)              | 1355                            | 1348        | $\nu(\text{C-OCH}_3) + \nu(\text{C=C})_{\text{TMP ring}} + \delta(\text{O-C-H})_{\text{methoxyl}} + \delta(\text{N-N-H})_{\text{hydrazone}}$                 |
| 1309 (m)              | 1350                            | 1343        | $\nu(\text{C=C})_{\text{MBA ring}} + \delta_{\text{ip}}(\text{C-O-H})_{\text{phenol}}$                                                                       |
| 1262 (m)              | 1307                            | 1292        | $\nu(\text{C=C})_{\text{MBA ring}} + \nu(\text{C-O})_{\text{phenol}}$                                                                                        |
| 1243 (s)              | 1265                            | 1252        | $\delta_{\text{ip}}(\text{C=C-H})_{\text{MBA ring}} + \delta_{\text{ip}}(\text{C=C-H})_{\text{TMP ring}} + \delta_{\text{ip}}(\text{C-O-H})_{\text{phenol}}$ |
| 1230 (sh)             | 1347                            | 1348        | $\nu(\text{C=C})_{\text{TMP ring}}$                                                                                                                          |
| 1135 (s)              | 1212                            | 1203        | $\delta(\text{O-C-H})_{\text{methoxyl}} + \delta(\text{N-N-H})_{\text{hydrazone}}$                                                                           |
| 1083 (m)              | 1189                            | 1185        | $\delta_{\text{ip}}(\text{C=C-H})_{\text{MBA ring}}$                                                                                                         |
| 1003 (m)              | 1164                            | 1161        | $\nu(\text{N-N})_{\text{hydrazone}}$                                                                                                                         |
| 943 (w)               | 1116                            | 1118        | $\delta_{\text{ip}}(\text{C=C-H})_{\text{MBA ring}} + \delta_{\text{ip}}(\text{C=C-H})_{\text{TMP ring}}$                                                    |
| 869 (w)               | 1071                            | 1047        | $\nu(\text{O-CH}_3)_{\text{methoxyl}}$                                                                                                                       |
| 845 (w)               | 1062                            | 1059        | $\delta(\text{C-C-H})_{\text{methyl}}$                                                                                                                       |
| 829 (w)               | 1056                            | -           | $\delta_{\text{ip}}(\text{N=C-H})_{\text{azomethine}}$                                                                                                       |
| 773 (m)               | 1027                            | 1009        | TMP breathing mode + $\nu(\text{O-CH}_3)_{\text{methoxyl}}$                                                                                                  |
| 754 (m)               | 966                             | 974         | $\delta_{\text{oop}}(\text{C-H})_{\text{azomethine}} + \delta_{\text{oop}}(\text{C-H})_{\text{MBA ring}}$                                                    |
| 737 (m)               | 857                             | 855         | $\delta_{\text{oop}}(\text{C-H})_{\text{TMP ring}} + \delta(\text{C=C-C})_{\text{MBA ring}}$                                                                 |
| 720 (m)               | 786                             | 768         | $\delta_{\text{oop}}(\text{O-H})_{\text{phenol}}$                                                                                                            |
| 670 (w)               | 779                             | 753         | $\delta_{\text{oop}}(\text{C-H})_{\text{MBA ring}}$                                                                                                          |

Intensities: w = weak; m = medium; s = strong; sh = shoulder.

**Table S4:** Experimental and calculated [gas, level of theory B3LYP/6-311++G(2d,p) and water phase, B3LYP/6-311G(d,p)/IEFPCM] IR data for the main absorptions of **hdz-NO<sub>2</sub>**, with proposed assignments.

| Experimental<br>(KBr) | Frequencies (cm <sup>-1</sup> ) |             | Vibrational assignments                                                                                                                                          |
|-----------------------|---------------------------------|-------------|------------------------------------------------------------------------------------------------------------------------------------------------------------------|
|                       | Gas phase                       | Water phase |                                                                                                                                                                  |
| 3455 (w)              | 3326                            | 3154        | $\nu(\text{O-H})_{\text{phenol}} + \nu(\text{O-H})_{\text{water}}$                                                                                               |
| 3222 (w)              | 3527                            | 3542        | $\nu(\text{N-H})$                                                                                                                                                |
| 3188 (sh)             | 3226                            | 3227        | $\nu(\text{C-H})_{\text{TMP ring}}$                                                                                                                              |
| 3088 (w)              | 3219                            | 3206        | $\nu(\text{C-H})_{\text{NBA ring}}$                                                                                                                              |
| 3008 (w)              | 3041                            | 3085        | $\nu(\text{C-H})_{\text{azomethine}}$                                                                                                                            |
| 2976 (w)              | 3139                            | 3146        | $\nu_{\text{as}}(\text{C-H})_{\text{methoxyl}}$                                                                                                                  |
| 2949 (w)              | 3088                            | 3133        | $\nu_{\text{as}}(\text{C-H})_{\text{methoxyl}}$                                                                                                                  |
| 2936 (w)              | 3066                            | 3086        | $\nu_{\text{as}}(\text{C-H})_{\text{methoxyl}}$                                                                                                                  |
| 2837 (w)              | 3010                            | 3021        | $\nu_{\text{sym}}(\text{C-H})_{\text{methoxyl}}$                                                                                                                 |
| 1648 (s)              | 1768                            | 1718        | $\nu(\text{C=O}) + \delta(\text{N-N-H})_{\text{hydrazone}}$                                                                                                      |
| 1622 (m)              | 1677                            | 1672        | $\nu(\text{C=N})_{\text{hydrazone}} + \delta_{\text{ip}}(\text{N=C-H})_{\text{azomethine}}$                                                                      |
| 1615 (sh)             | 1664                            | 1655        | $\nu(\text{C=C})_{\text{NBA ring}}$                                                                                                                              |
| 1584 (m)              | 1620                            | 1615        | $\nu(\text{C=C})_{\text{TMP ring}} + \delta_{\text{ip}}(\text{C=C-H})_{\text{TMP ring}}$                                                                         |
| 1523 (sh)             | 1613                            | 1612        | $\nu(\text{C=C})_{\text{NBA ring}} + \delta_{\text{ip}}(\text{C-O-H})_{\text{phenol}} + \text{ip}(\text{C=C-H})_{\text{NBA ring}}$                               |
| 1519 (m)              | 1608                            | 1572        | $\nu_{\text{as}}(\text{NO}_2) + \nu(\text{C=C})_{\text{NBA ring}} + \delta_{\text{ip}}(\text{C=C-H})_{\text{NBA ring}}$                                          |
| 1503 (s)              | 1548                            | 1554        | $\delta(\text{N-N-H})_{\text{hydrazone}} + \nu(\text{C=C})_{\text{TMP ring}}$                                                                                    |
| 1462 (m)              | 1504                            | 1497        | $\delta(\text{H-C-H})_{\text{methoxyl}}$                                                                                                                         |
| 1455 (m)              | 1493                            | 1495        | $\delta(\text{H-C-H})_{\text{methoxyl}}$                                                                                                                         |
| 1436 (w)              | 1487                            | -           | $\delta_{\text{ip}}(\text{C=C-H})_{\text{NBA ring}} + \delta(\text{H-C-H})_{\text{methoxyl}} + \delta(\text{O-C-H})_{\text{methoxyl}}$                           |
| 1414 (m)              | 1465                            | 1461        | $\delta(\text{O-C-H})_{\text{methoxyl}}$                                                                                                                         |
| 1359 (m)              | 1432                            | 1447        | $\delta_{\text{ip}}(\text{C-O-H})_{\text{phenol}} + \delta_{\text{ip}}(\text{C=C-H})_{\text{NBA ring}}$                                                          |
| 1336 (s)              | 1379                            | 1369        | $\nu_{\text{sym}}(\text{NO}_2) + \delta_{\text{ip}}(\text{C-O-H})_{\text{phenol}} + \delta_{\text{ip}}(\text{C=C-H})_{\text{NBA ring}}$                          |
| 1305 (w)              | 1332                            | 1332        | $\nu(\text{C=C})_{\text{NBA ring}}$                                                                                                                              |
| 1272 (m)              | 1326                            | 1303        | $\nu(\text{C-O})_{\text{phenol}} + \delta_{\text{ip}}(\text{C=C-H})_{\text{NBA ring}}$                                                                           |
| 1245 (m)              | 1274                            | 1276        | $\nu(\text{C-OCH}_3) + \delta_{\text{ip}}(\text{C=C-H})_{\text{TMP ring}}$                                                                                       |
| 1230 (m)              | 1261                            | 1250        | $\nu(\text{C-OCH}_3) + \delta_{\text{ip}}(\text{C=C-H})_{\text{TMP ring}}$                                                                                       |
| 1188 (m)              | 1259                            | 1263        | $\delta_{\text{ip}}(\text{C=C-H})_{\text{TMP ring}} + \delta_{\text{ip}}(\text{C=C-H})_{\text{NBA ring}} + \delta_{\text{ip}}(\text{N=C-H})_{\text{azomethine}}$ |
| 1135 (s)              | 1222                            | 1225        | $\delta(\text{O-C-H})_{\text{methoxyl}} + \delta(\text{N-N-H})_{\text{hydrazone}}$                                                                               |
| 1081 (w)              | 1206                            | 1205        | $\delta_{\text{ip}}(\text{C=C-H})_{\text{NBA ring}}$                                                                                                             |
| 997 (m)               | 1169                            | 1167        | $\nu(\text{N-N})_{\text{hydrazone}} + \delta(\text{O-C-H})_{\text{methoxyl}} + \delta_{\text{ip}}(\text{C=C-H})_{\text{aromatic}}$                               |
| 862 (w)               | 1115                            | 1117        | $\delta_{\text{ip}}(\text{C=C-H})_{\text{aromatic}}$                                                                                                             |
| 845 (w)               | 1067                            | 1148        | $\nu(\text{O-CH}_3)_{\text{methoxyl}}$                                                                                                                           |
| 819 (w)               | 958                             | 961         | $\nu(\text{C-NO}_2) + \delta(\text{C=C-C})_{\text{aromatic}}$                                                                                                    |
| 770 (w)               | 879                             | 863         | $\delta(\text{C=C-C})_{\text{NBA ring}} + \delta_{\text{oop}}(\text{C-H})_{\text{TMP ring}}$                                                                     |
| 747 (m)               | 818                             | 832         | <b>NBA breathing mode</b> + $\delta_{\text{oop}}(\text{O-H})_{\text{phenol}}$                                                                                    |
| 665 (w)               | 757                             | 757         | $\delta_{\text{oop}}(\text{C-H})_{\text{NBA ring}}$                                                                                                              |

Intensities: w = weak; m = medium; s = strong; sh = shoulder.



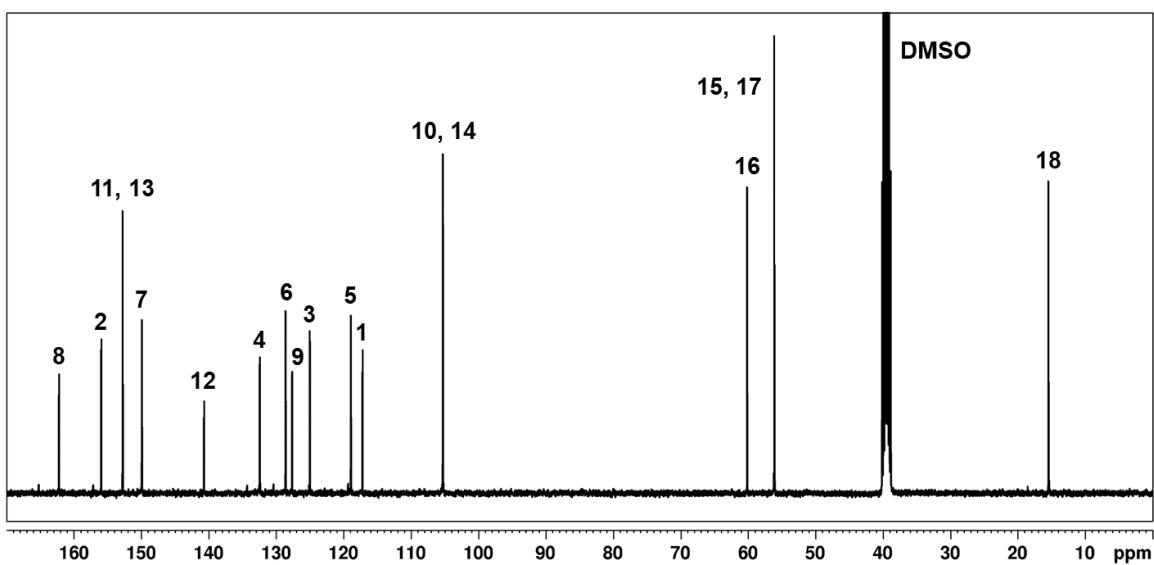

**Figure S5:**  $^{13}\text{C}$  NMR (100 MHz) spectra of **hdz-CH<sub>3</sub>** in  $\text{DMSO-}d_6$  at 25 °C.

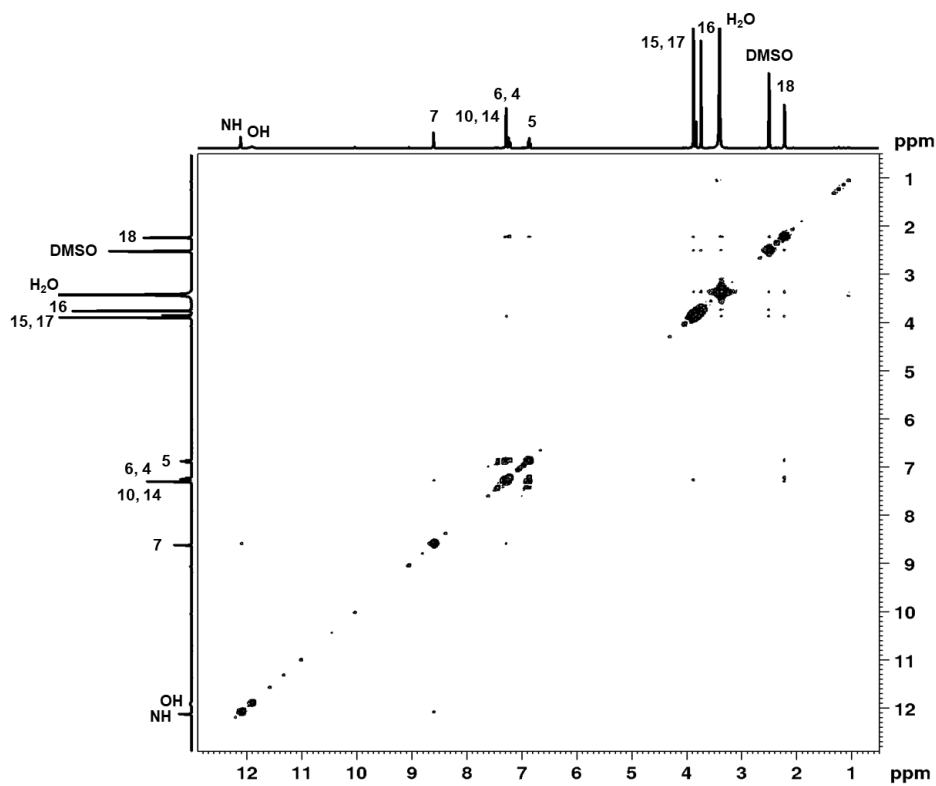

**Figure S6:** COSY contour map of **hdz-CH<sub>3</sub>** in  $\text{DMSO-}d_6$  at 25 °C.

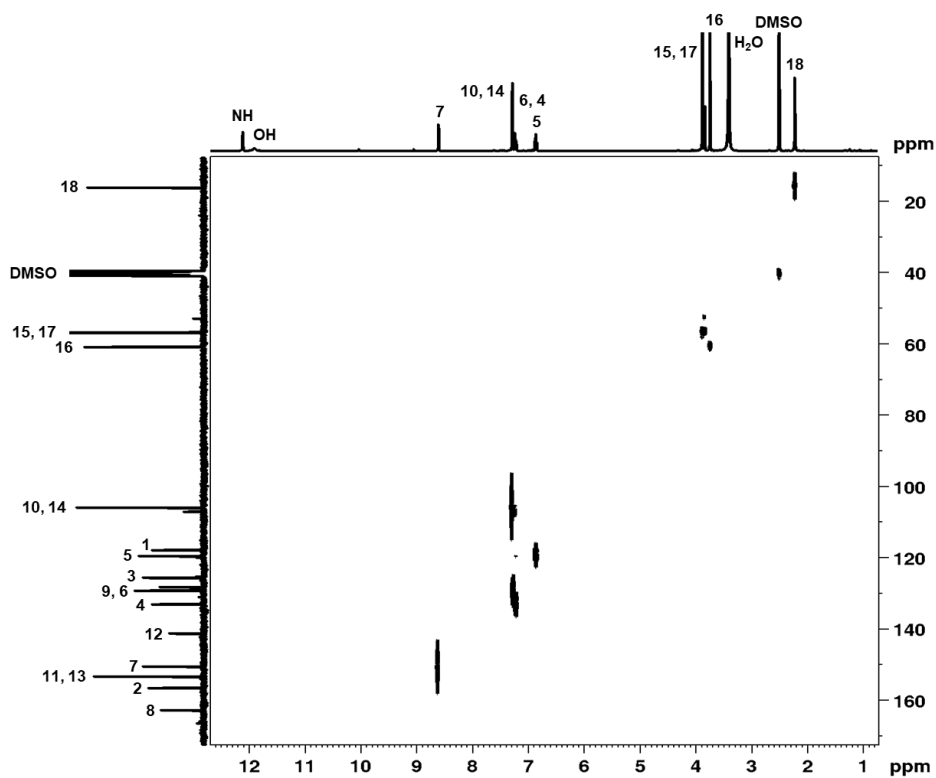

**Figure S7:** HSQC contour map of **hdz-CH<sub>3</sub>** in DMSO-*d*<sub>6</sub> at 25 °C.

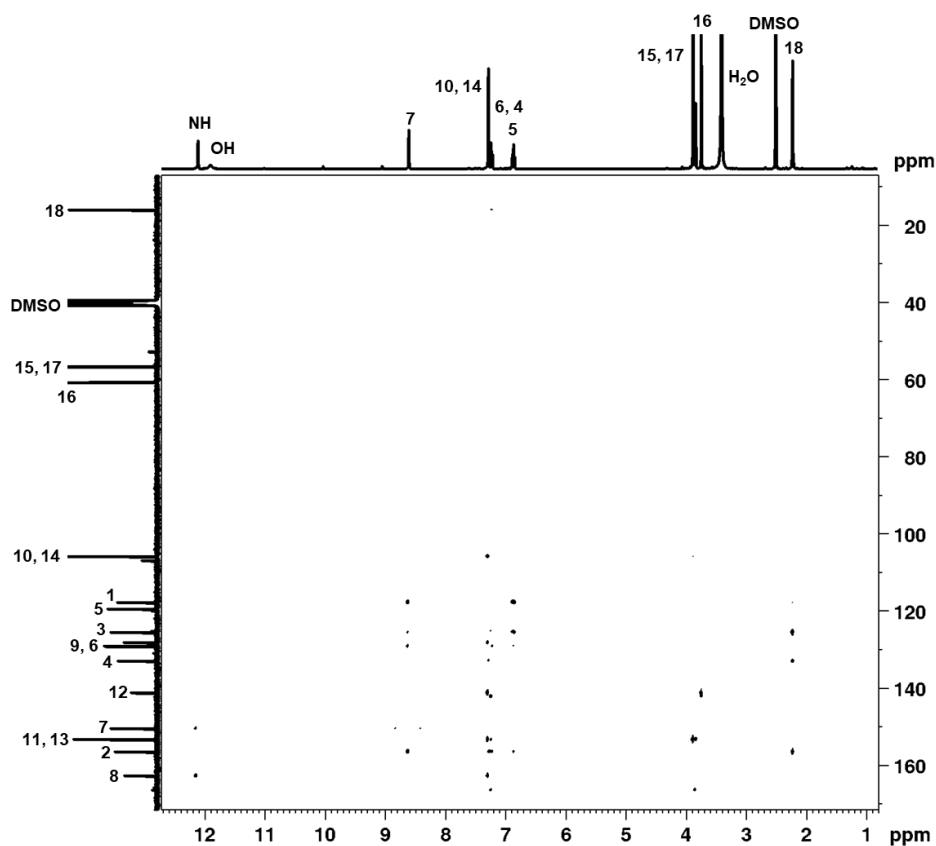

**Figure S8:** HMBC contour map of **hdz-CH<sub>3</sub>** in DMSO-*d*<sub>6</sub> at 25 °C.

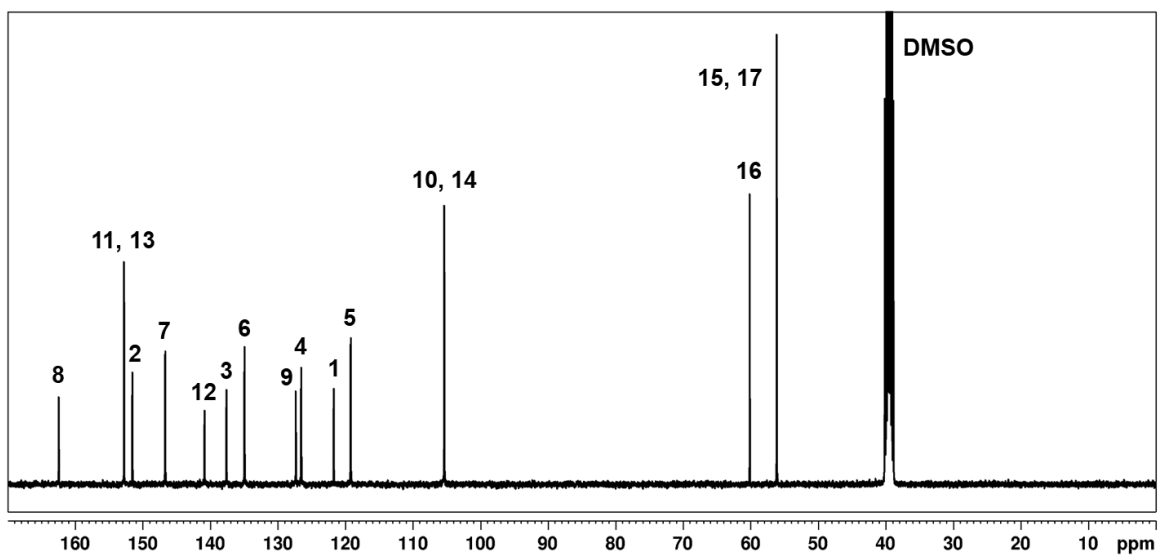

**Figure S9:**  $^{13}\text{C}$  NMR (100 MHz) spectra of **hdz-NO<sub>2</sub>** in  $\text{DMSO-}d_6$  at 25 °C.

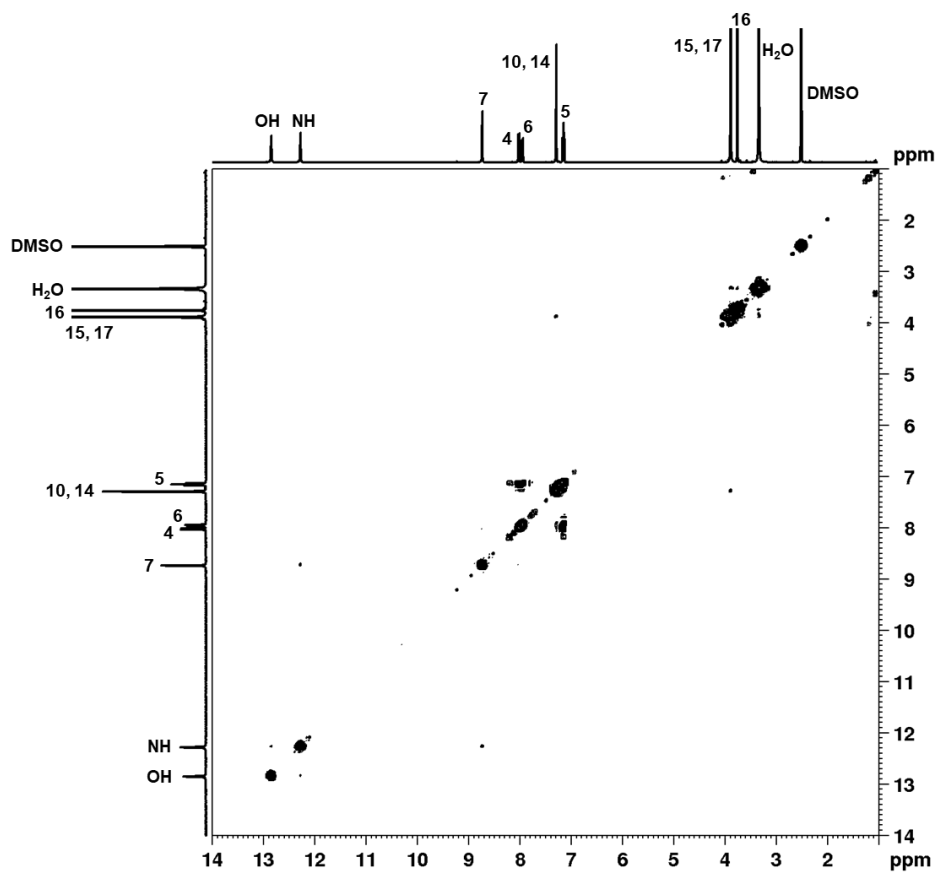

**Figure S10:** COSY contour map of **hdz-NO<sub>2</sub>** in  $\text{DMSO-}d_6$  at 25 °C.

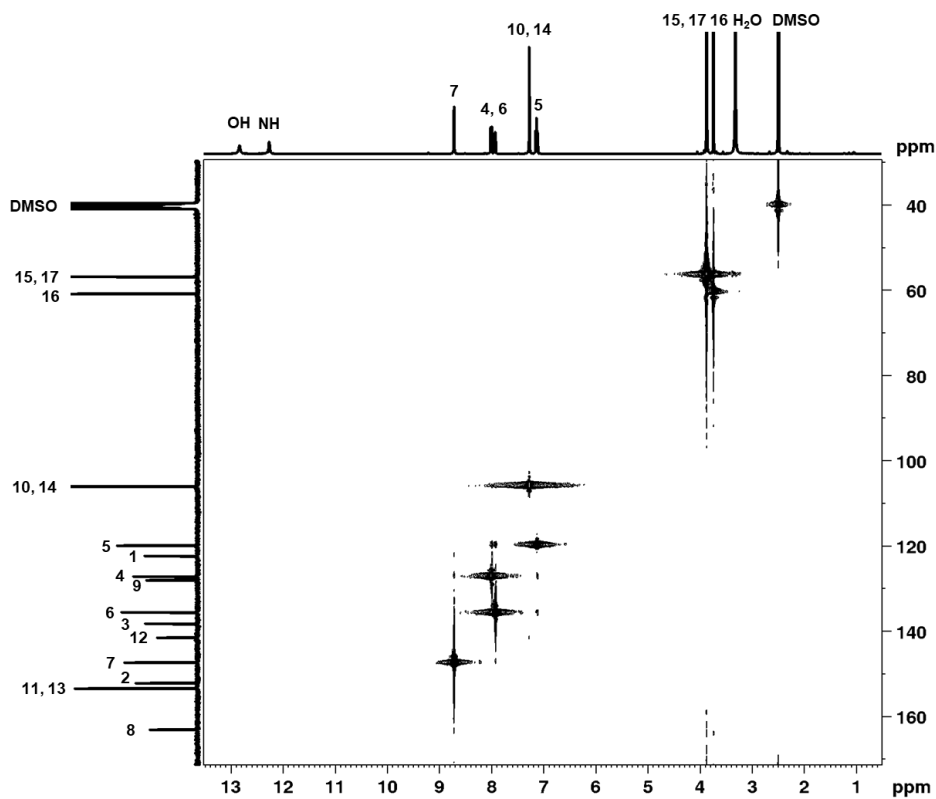

Figure S11: HSQC contour map of **hdz-NO<sub>2</sub>** in DMSO-*d*<sub>6</sub> at 25 °C.

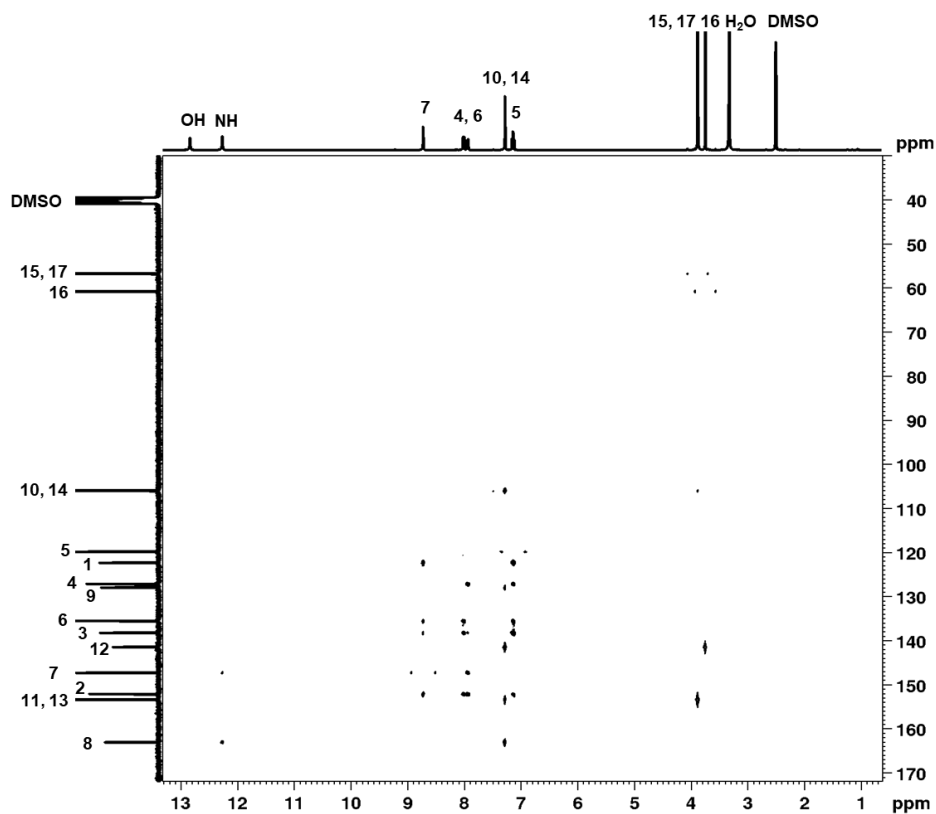

Figure S12: HMBC contour map of **hdz-NO<sub>2</sub>** in DMSO-*d*<sub>6</sub> at 25 °C.

**Table S5:**  $^1\text{H}$  (400 MHz) and  $^{13}\text{C}$  (100 MHz) NMR signal assignments for **hdz-CH<sub>3</sub>** and **hdz-NO<sub>2</sub>**, in DMSO-*d*<sub>6</sub> at 25 °C.

| <b>hdz-CH<sub>3</sub></b> |                                |                                          |                                                                                                                                      | <b>hdz-NO<sub>2</sub></b> |                                |                                                                          |                                                                                                           |
|---------------------------|--------------------------------|------------------------------------------|--------------------------------------------------------------------------------------------------------------------------------------|---------------------------|--------------------------------|--------------------------------------------------------------------------|-----------------------------------------------------------------------------------------------------------|
| C/H                       | $\delta^{13}\text{C}$<br>(ppm) | $\delta^1\text{H}$<br>(ppm)              | $^{13}\text{C}, ^1\text{H}$ HMBC                                                                                                     | C/H                       | $\delta^{13}\text{C}$<br>(ppm) | $\delta^1\text{H}$<br>(ppm)                                              | $^{13}\text{C}, ^1\text{H}$ HMBC                                                                          |
| <b>1</b>                  | 117.22                         | -                                        | H5 ( $^3J_{\text{CH}}$ ), H7 ( $^2J_{\text{CH}}$ ),<br>H18 ( $^4J_{\text{CH}}$ )                                                     | <b>1</b>                  | 121.73                         | -                                                                        | H5 ( $^3J_{\text{CH}}$ ), H7 ( $^2J_{\text{CH}}$ )                                                        |
| <b>2</b>                  | 155.97                         | -                                        | H4 ( $^3J_{\text{CH}}$ ), H5 ( $^4J_{\text{CH}}$ ), H6<br>( $^3J_{\text{CH}}$ ), H7 ( $^3J_{\text{CH}}$ ), H18 ( $^3J_{\text{CH}}$ ) | <b>2</b>                  | 151.56                         | -                                                                        | H4 ( $^3J_{\text{CH}}$ ), H5 ( $^4J_{\text{CH}}$ ),<br>H6 ( $^3J_{\text{CH}}$ ), H7 ( $^3J_{\text{CH}}$ ) |
| <b>3</b>                  | 125.03                         | -                                        | H4 ( $^2J_{\text{CH}}$ ), H5 ( $^3J_{\text{CH}}$ ),<br>H7 ( $^4J_{\text{CH}}$ ), H18 ( $^2J_{\text{CH}}$ )                           | <b>3</b>                  | 137.64                         | -                                                                        | H4 ( $^2J_{\text{CH}}$ ), H5 ( $^3J_{\text{CH}}$ ),<br>H6 ( $^4J_{\text{CH}}$ ), H7 ( $^4J_{\text{CH}}$ ) |
| <b>4</b>                  | 132.44                         | 7.22 (d, 1H, $^3J_{\text{HH}} = 7.5$ Hz) | H5 ( $^2J_{\text{CH}}$ ), H6 ( $^3J_{\text{CH}}$ ),<br>H18 ( $^3J_{\text{CH}}$ )                                                     | <b>4</b>                  | 126.56                         | 8.01 (dd, 1H, $^3J_{\text{HH}} = 7.9$ Hz,<br>$^4J_{\text{HH}} = 1.5$ Hz) | H5 ( $^2J_{\text{CH}}$ ), H6 ( $^3J_{\text{CH}}$ )                                                        |
| <b>5</b>                  | 118.94                         | 6.86 (t, 1H, $^3J_{\text{HH}} = 7.5$ Hz) | -                                                                                                                                    | <b>5</b>                  | 119.23                         | 7.14 (t, 1H, $^3J_{\text{HH}} = 7.9$ Hz)                                 | -                                                                                                         |
| <b>6</b>                  | 128.61                         | 7.28 (d, 1H, $^3J_{\text{HH}} = 7.5$ Hz) | H4 ( $^3J_{\text{CH}}$ ), H5 ( $^2J_{\text{CH}}$ ),<br>H7 ( $^3J_{\text{CH}}$ )                                                      | <b>6</b>                  | 134.95                         | 7.94 (dd, 1H, $^3J_{\text{HH}} = 7.9$ Hz,<br>$^4J_{\text{HH}} = 1.5$ Hz) | H4 ( $^3J_{\text{CH}}$ ), H5 ( $^2J_{\text{CH}}$ ), H7 ( $^3J_{\text{CH}}$ )                              |
| <b>7</b>                  | 149.95                         | 8.58 (s, 1H)                             | H6 ( $^3J_{\text{CH}}$ ), NH ( $^3J_{\text{CH}}$ )                                                                                   | <b>7</b>                  | 146.70                         | 8.74 (s, 1H)                                                             | H6 ( $^3J_{\text{CH}}$ ), NH ( $^3J_{\text{CH}}$ )                                                        |
| <b>8</b>                  | 162.21                         | -                                        | H10/H14 ( $^3J_{\text{CH}}$ ), NH ( $^2J_{\text{CH}}$ )                                                                              | <b>8</b>                  | 162.46                         | -                                                                        | H10/H14 ( $^3J_{\text{CH}}$ ), NH ( $^2J_{\text{CH}}$ )                                                   |
| <b>9</b>                  | 127.65                         | -                                        | H10/H14 ( $^2J_{\text{CH}}$ )                                                                                                        | <b>9</b>                  | 127.37                         | -                                                                        | H10/H14 ( $^2J_{\text{CH}}$ )                                                                             |
| <b>10, 14</b>             | 105.32                         | 7.27 (s, 2H)                             | H10/H14 ( $^3J_{\text{CH}}$ )*,<br>H15/H17 ( $^4J_{\text{CH}}$ )                                                                     | <b>10, 14</b>             | 105.38                         | 7.28 (s, 2H)                                                             | H10/H14 ( $^3J_{\text{CH}}$ )*,<br>H15/H17 ( $^4J_{\text{CH}}$ )                                          |
| <b>11, 13</b>             | 152.78                         | -                                        | H10/H14 ( $^2J_{\text{CH}} / ^4J_{\text{CH}}$ ),<br>H15/H17 ( $^3J_{\text{CH}}$ )                                                    | <b>11, 13</b>             | 152.79                         | -                                                                        | H10/H14 ( $^2J_{\text{CH}} / ^4J_{\text{CH}}$ ),<br>H15/H17 ( $^3J_{\text{CH}}$ )                         |
| <b>12</b>                 | 140.70                         | -                                        | H10/H14 ( $^3J_{\text{CH}}$ ), H16 ( $^3J_{\text{CH}}$ )                                                                             | <b>12</b>                 | 140.87                         | -                                                                        | H10/H14 ( $^3J_{\text{CH}}$ ), H16 ( $^3J_{\text{CH}}$ )                                                  |
| <b>15, 17</b>             | 56.16                          | 3.88 (s, 6H)                             | -                                                                                                                                    | <b>15, 17</b>             | 56.15                          | 3.88 (s, 6H)                                                             | -                                                                                                         |
| <b>16</b>                 | 60.16                          | 3.74 (s, 3H)                             | -                                                                                                                                    | <b>16</b>                 | 60.16                          | 3.74 (s, 3H)                                                             | -                                                                                                         |
| <b>18</b>                 | 15.48                          | 2.22 (s, 3H)                             | H4 ( $^3J_{\text{CH}}$ )                                                                                                             | -                         | -                              | -                                                                        | -                                                                                                         |
| <b>OH</b>                 | -                              | 11.89 (s, 1H)                            | -                                                                                                                                    | <b>OH</b>                 | -                              | 12.84 (s, 1H)                                                            | -                                                                                                         |
| <b>NH</b>                 | -                              | 12.05 (s, 1H)                            | -                                                                                                                                    | <b>NH</b>                 | -                              | 12.27 (s, 1H)                                                            | -                                                                                                         |

Multiplicity: s = singlet; d = doublet; dd = double of doublets; t = triplet.

\*C10 to H14 and C14 to H10

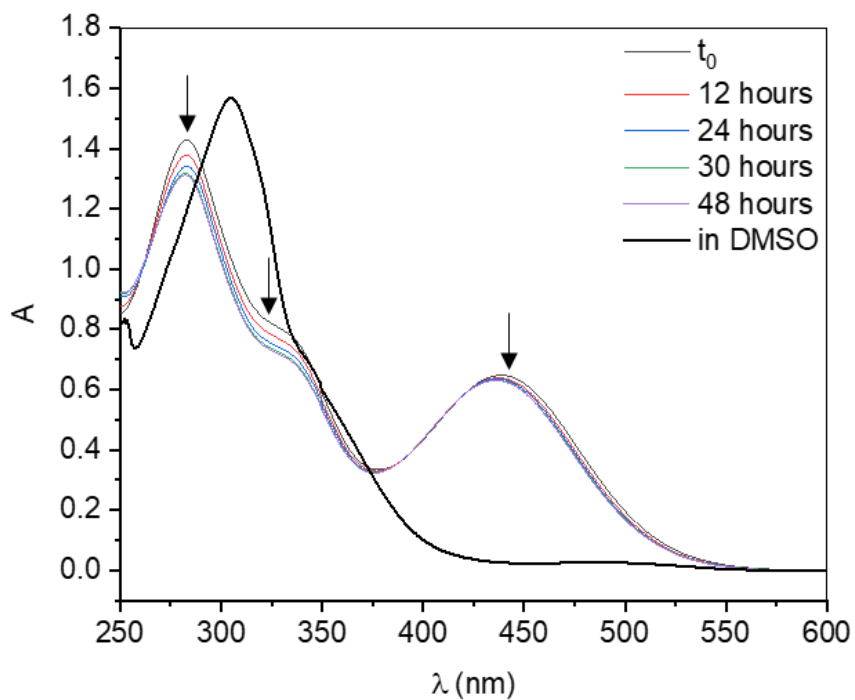

**Figure S13:** Electronic absorption spectra in selected wavelength regions for a solution of **hdz-NO<sub>2</sub>** in 10% DMSO/HEPES mixture (pH 7.4). Experimental conditions:  $l = 1.0$  cm and  $T = (25.0 \pm 0.1)$  °C. Spectra were measured at  $t_0$  and after 12, 24, 30, and 48 h. Absorption in pure DMSO was added for the sake of comparison.
